# Supplementary material
Source: PubMed Central journal article supplement (PMC5209264)

A

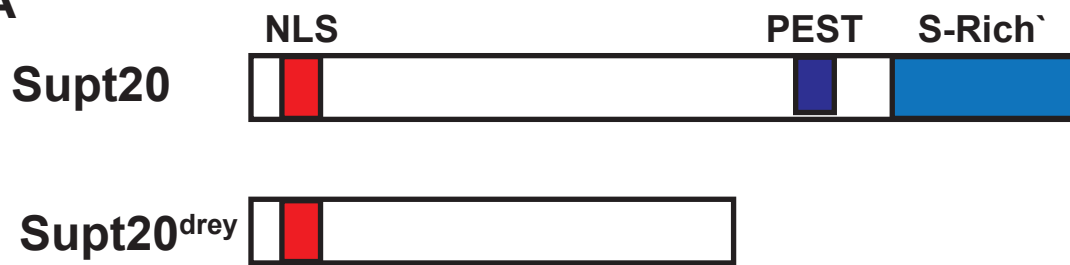

B

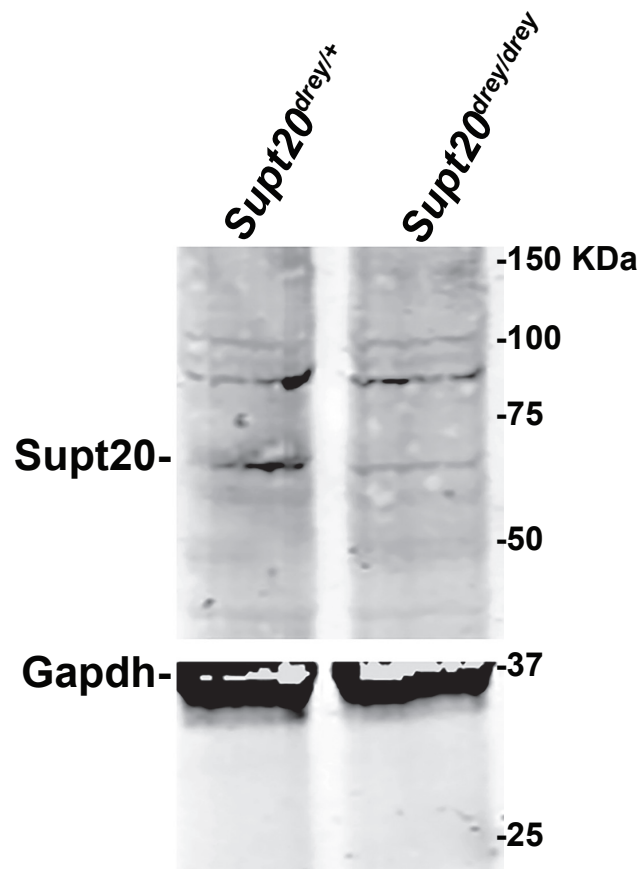

Supplement: NIHMS837077-supplement.pdf [file NIHMS837077-supplement.pdf]
